# Supplementary material for: Rasagiline and Rapid Symptomatic Motor Effect in Parkinson’s Disease: Review of Literature
Source: PubMed Central journal article supplement — Neurol Ther. 2013 Dec 17;3(1):41–66. doi: 10.1007/s40120-013-0014-1 (PMC4381918; doi:10.1007/s40120-013-0014-1), 2013-12-17
Supplement: 40120_2013_14_MOESM1_ESM.pdf [file 40120_2013_14_MOESM1_ESM.pdf]

- Rasagiline is a monoamine oxidase type-B inhibitor used as monotherapy or in addition to levodopa in the treatment of Parkinson's disease. Once daily administration of rasagiline makes it easy to use, and allows good compliance by patients and adherence to therapy.
- Several multicenter studies have noted the effectiveness of rasagiline on both motor and non-motor symptoms, which require a complex pharmacologic approach, such as cognitive disorders. A recent study also reported a rapid action of rasagiline on motor symptoms.
- Positive findings have been highlighted by an economic model study. This review analyzes the main studies of rasagiline, with particular attention to the effectiveness of the drug on motor symptoms.
- Considering also the simplicity of administration, good compliance and the low presence of side effects, the importance of rasagiline in the treatment of patients with PD at all stages of the disease is well established.

This summary slide represents the opinions of the authors. No funding or sponsorship was received for this study or publication of this article. For a full list of acknowledgments and conflicts of interest for all authors of this article, please see the full text online. Copyright © The Authors 2013. Creative Commons Attribution Noncommercial License (CC BY-NC).
